# Supplementary material
Source: PubMed Central journal article supplement (PMC395915)

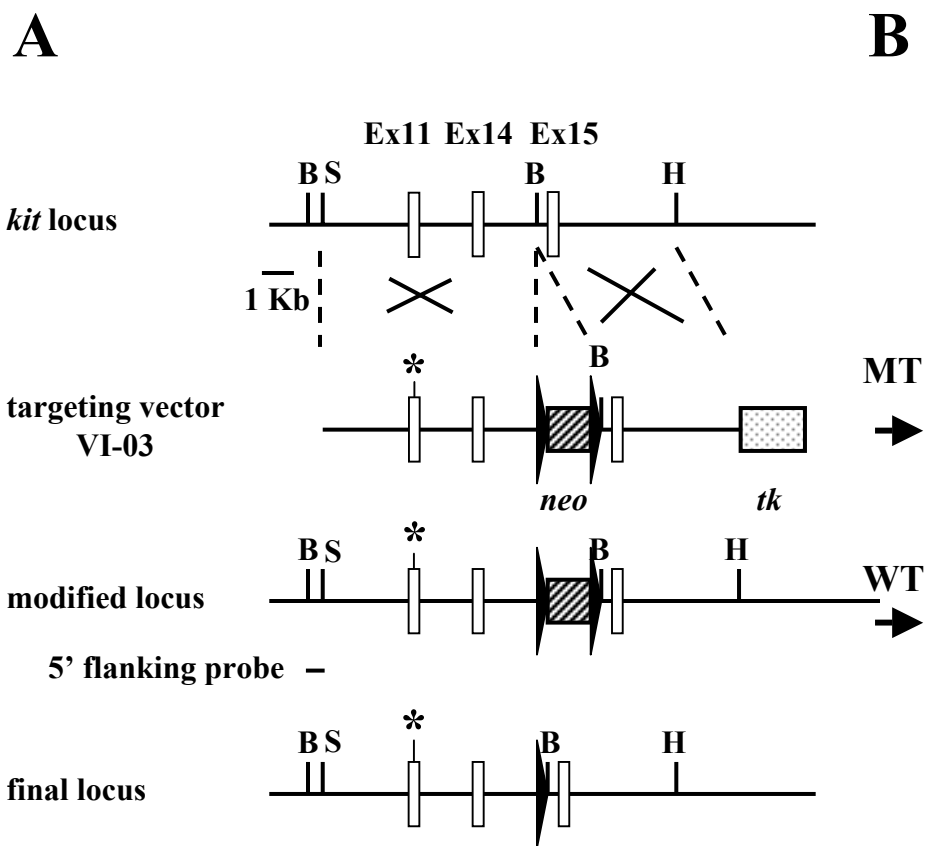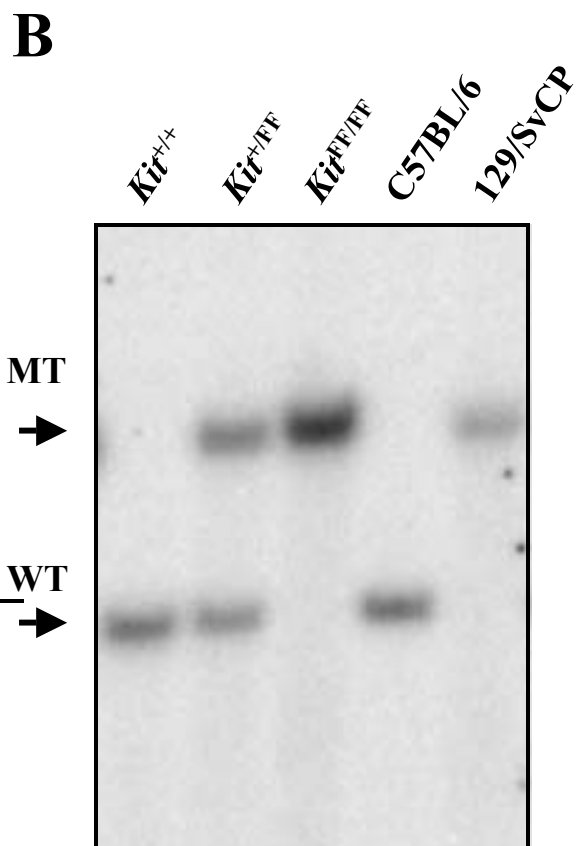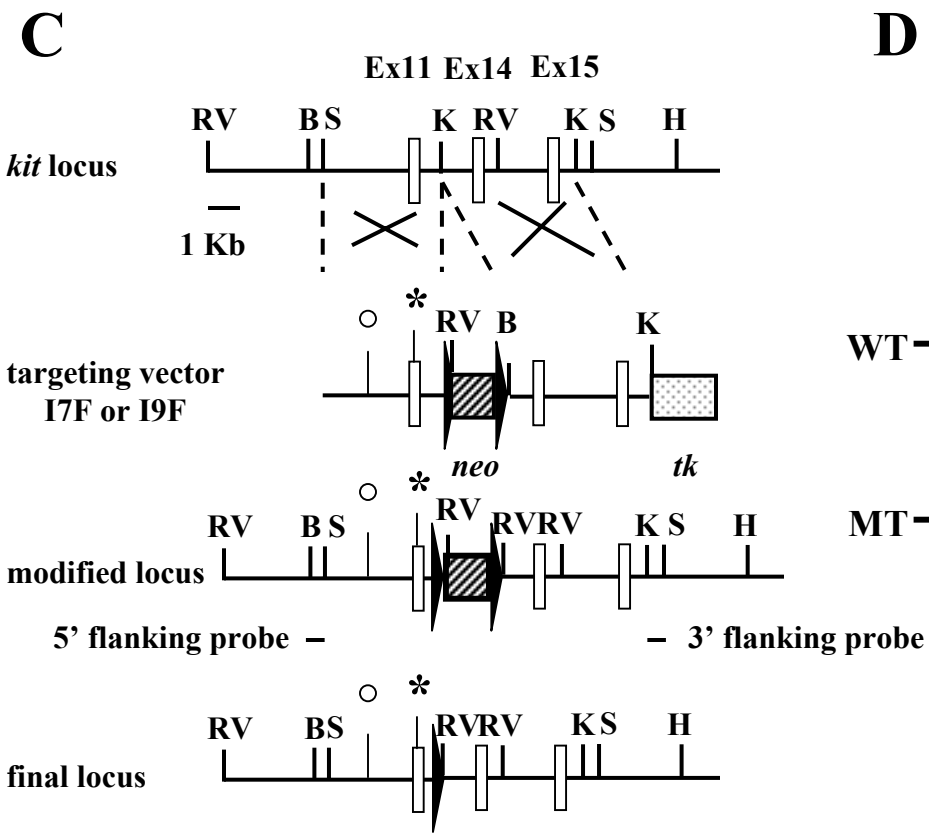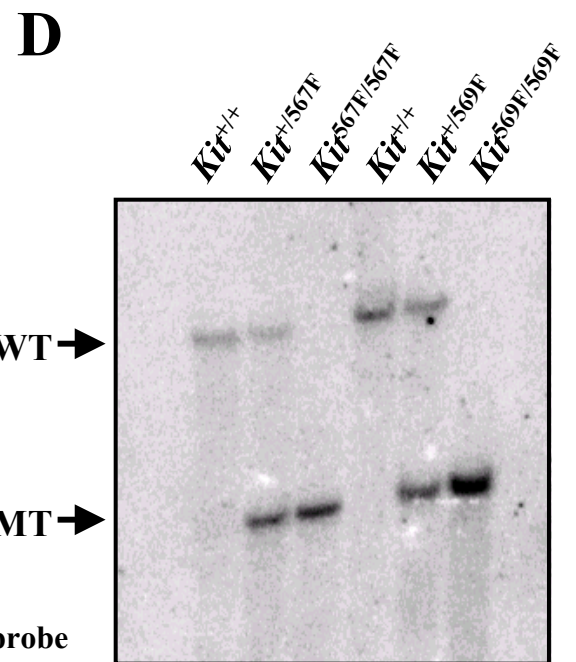

Supplement: pnas_101_16_6015__3.pdf [file pnas_101_16_6015__3.pdf]
